# Supplementary material for: MoS2 Nanosheet–Pd Nanoparticle Composite for Highly Sensitive Room Temperature Detection of Hydrogen
Source: PubMed Central journal article supplement (PMC5115349; doi:10.1002/advs.201500004), 2015-03-02
Supplement: ADVS-2-0j-s001.pdf [file ADVS-2-0j-s001.pdf]

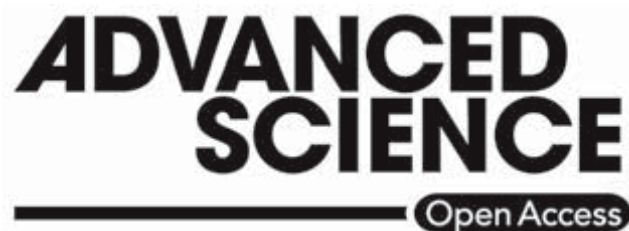

## Supporting Information

for *Adv. Sci.*, DOI: 10.1002/advs.201500004

**MoS<sub>2</sub> Nanosheet–Pd Nanoparticle Composite for Highly Sensitive Room Temperature Detection of Hydrogen**

*Cihan Kuru, Chulmin Choi, Alireza Kargar, Duyoung Choi, Young Jin Kim, Chin Hung Liu, Serdar Yavuz, and Sungho Jin\**

Supporting Information

**MoS<sub>2</sub> nanosheet-Pd nanoparticle composite for highly sensitive room temperature detection of hydrogen**

*Cihan Kuru, Chulmin Choi, Alireza Kargar, Duyoung Choi, Young Jin Kim, Chin Hung Liu, Serdar Yavuz, and Sungho Jin\**

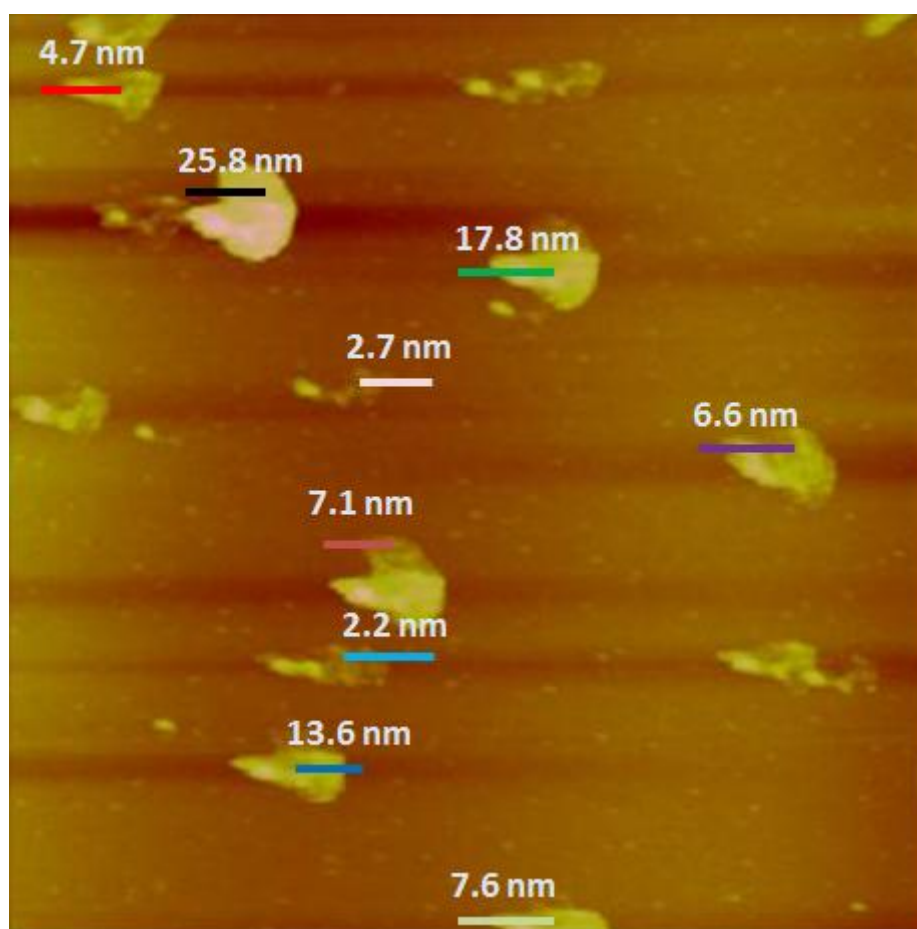

**Figure S1.** AFM image of MoS<sub>2</sub> flakes dispersed on a Si substrate.

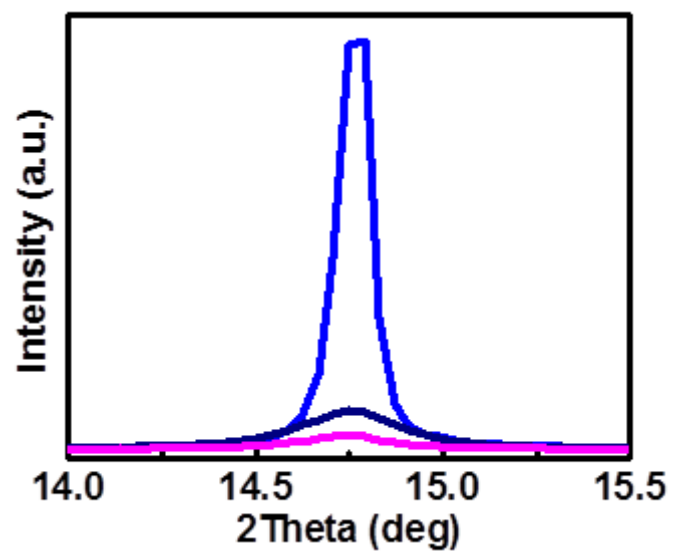

**Figure S2.** (002) XRD peak of bulk MoS<sub>2</sub> (blue curve), MoS<sub>2</sub> nanosheets (navy curve) and MoS<sub>2</sub>-Pd composite (magenta curve).

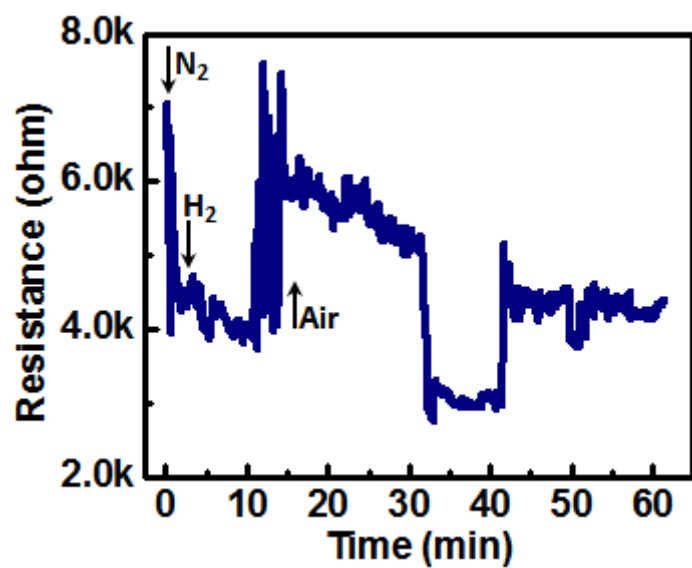

**Figure S3.** Electrical response of MoS<sub>2</sub> nanosheets to 50,000 ppm H<sub>2</sub>.

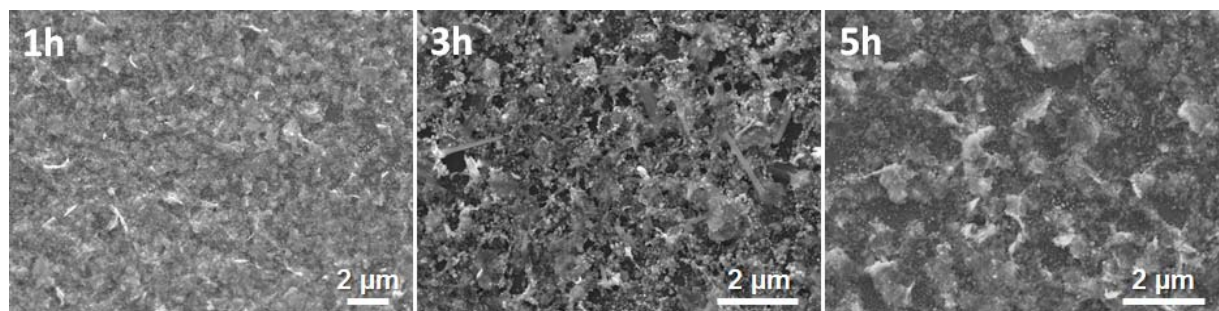

**Figure S4.** SEM images of MoS<sub>2</sub>-Pd composites annealed at 500° C for (a) 1h, (b) 3h and (c) 5 h.

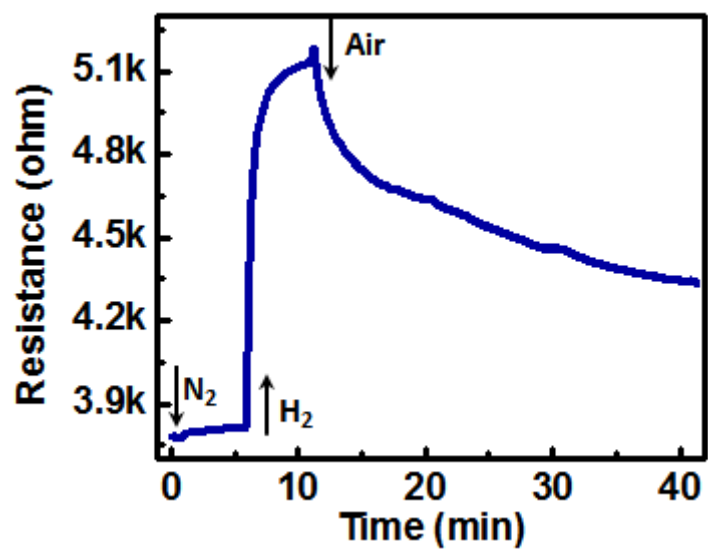

**Figure S5.** Electrical response of graphene-Pd composite to 50,000 ppm H<sub>2</sub>.

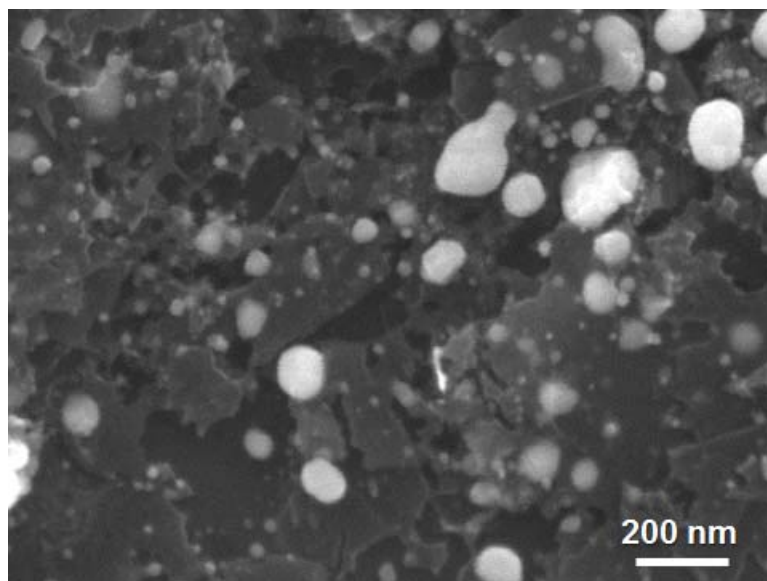

**Figure S6.** SEM image of graphene-Pd composite.
